# Supplementary material for: Trajectories of Mediterranean Diet Adherence and Risk of Hypertension in China: Results from the CHNS Study, 1997–2011
Source: PubMed Central journal article supplement (PMC6315578; doi:10.3390/nu10122014), 2018-12-19
Supplement: nutrients-10-02014-s001.pdf [file nutrients-10-02014-s001.pdf]

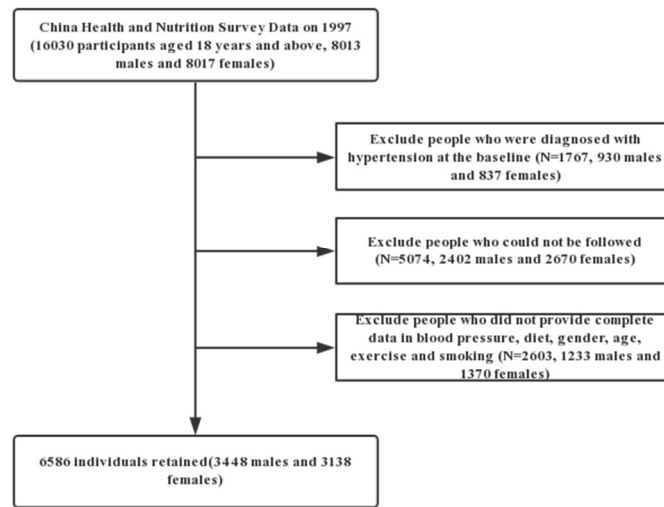

Figure S1. Flow chart of the China Health and Nutrition Survey analytic sample.

Table S1. Estimation process for the trajectory groups of MDA.

| Number of Groups | Polynomial | BIC      | Proportion of groups (%) |         |         |         |         |         |         |  |
|------------------|------------|----------|--------------------------|---------|---------|---------|---------|---------|---------|--|
|                  |            |          | Group 1                  | Group 2 | Group 3 | Group 4 | Group 5 | Group 6 | Group 7 |  |
| 1                | 1          | -42962.5 | 100.00                   |         |         |         |         |         |         |  |
| 2                | 1 1        | -38389.2 | 63.64                    | 36.36   |         |         |         |         |         |  |
| 3                | 1 1 1      | -38081.9 | 46.00                    | 21.85   | 32.15   |         |         |         |         |  |
| 4                | 1 1 1 1    | -37879.5 | 45.53                    | 19.12   | 16.99   | 18.36   |         |         |         |  |
| 5                | 1 1 1 1 1  | -37844.8 | 14.46                    | 22.42   | 29.82   | 9.84    | 23.47   |         |         |  |
| 6                | 1 1 1 1 1  | -37809.3 | 13.43                    | 4.34    | 34.70   | 17.75   | 23.17   | 6.61    |         |  |
| 7                | 1 1 1 1 1  | -37822.4 | 13.20                    | 4.28    | 13.51   | 17.73   | 23.16   | 6.59    | 21.53   |  |
| 6                | 2 2 2 2 2  | -37420.6 | 19.08                    | 20.17   | 20.41   | 22.96   | 11.18   | 6.20    |         |  |
| 6                | 3 3 3 3 3  | -37255.6 | 16.35                    | 16.17   | 2.59    | 19.04   | 37.06   | 8.79    |         |  |
| 6                | 4 4 4 4 4  | -37201.9 | 18.83                    | 21.09   | 25.54   | 18.80   | 10.86   | 4.89    |         |  |

BIC, Bayesian information criterion; MDA, Mediterranean diet adherence.

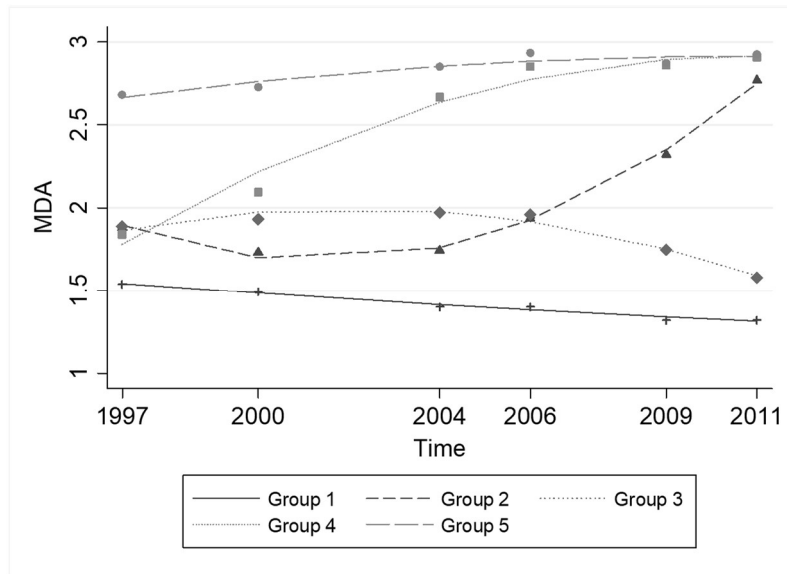

Figure S2. MDA showing differences across waves (5 groups).

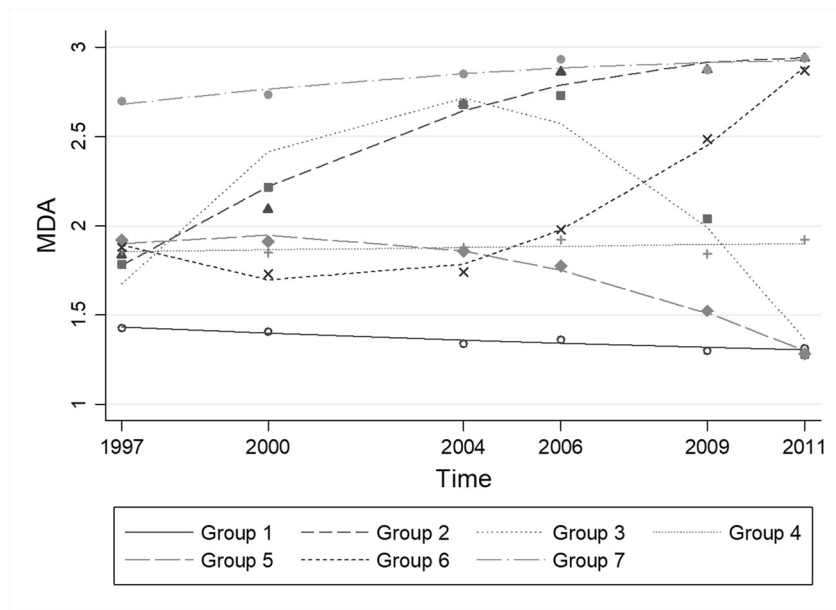

Figure S3. MDA showing differences across waves (7 groups).

Table S2. SBP and DBP values according to 5 trajectories of MDA.

|                                 | SBP    |        |        |        | DBP   |        |        |       |
|---------------------------------|--------|--------|--------|--------|-------|--------|--------|-------|
|                                 | Coef.  | P      | 95% CI |        | Coef. | P      | 95% CI |       |
| Low Adherence (reference group) | 0.00   |        |        |        | 0.00  |        |        |       |
| Group 2                         | -7.49  | <0.001 | -8.54  | -6.45  | -4.56 | <0.001 | -5.20  | -3.92 |
| Group 3                         | -0.26  | 0.514  | -1.05  | 0.52   | -0.28 | 0.244  | -0.76  | 0.19  |
| Group 4                         | -13.40 | <0.001 | -14.40 | -12.39 | -7.74 | <0.001 | -8.36  | -7.12 |
| Group 5                         | -8.44  | <0.001 | -11.11 | -5.76  | -3.82 | <0.001 | -5.48  | -2.15 |

Coef., coefficient; CI, confidence interval; SBP, systolic blood pressure; DBP, diastolic blood pressure; MDA, Mediterranean diet adherence.

**Table S3.** SBP and DBP values according to 7 trajectories of MDA.

|                                 | SBP    |        |        |        | DBP   |        |        |       |
|---------------------------------|--------|--------|--------|--------|-------|--------|--------|-------|
|                                 | Coef.  | P      | 95% CI |        | Coef. | P      | 95% CI |       |
| Low Adherence (reference group) | 0.00   |        |        |        | 0.00  |        |        |       |
| Group 2                         | -14.01 | <0.001 | -15.08 | -12.95 | -8.15 | <0.001 | -8.80  | -7.49 |
| Group 3                         | -6.90  | <0.001 | -8.79  | -5.00  | -3.33 | <0.001 | -4.50  | -2.17 |
| Group 4                         | -0.46  | 0.317  | -1.37  | 0.44   | -0.77 | 0.006  | -1.32  | -0.21 |
| Group 5                         | -0.87  | 0.080  | -1.84  | 0.10   | -0.20 | 0.517  | -0.79  | 0.39  |
| Group 6                         | -8.57  | <0.001 | -9.73  | -7.40  | -5.16 | <0.001 | -5.88  | -4.45 |
| Group 7                         | -8.18  | <0.001 | -10.85 | -5.51  | -3.84 | <0.001 | -5.50  | -2.18 |

Coef., coefficient; CI, confidence interval; SBP, systolic blood pressure; DBP, diastolic blood pressure; MDA, Mediterranean diet adherence.

**Table S4.** Hazard Ratios for Hypertension According to MDA and changes in MDA.

|                                 | Age-and Gender-Adjusted <sup>a</sup> |        |      | Multivariate-Adjusted <sup>b</sup> |        |      |
|---------------------------------|--------------------------------------|--------|------|------------------------------------|--------|------|
|                                 | HR                                   | 95% CI |      | HR                                 | 95% CI |      |
| Low Adherence (reference group) | 1.00                                 |        |      | 1.00                               |        |      |
| Group 2                         | 0.35                                 | 0.27   | 0.47 | 0.41                               | 0.31   | 0.55 |
| Group 3                         | 0.98                                 | 0.88   | 1.10 | 0.97                               | 0.86   | 1.09 |
| Group 4                         | 1.01                                 | 0.89   | 1.15 | 0.99                               | 0.87   | 1.14 |
| Group 5                         | 0.74                                 | 0.60   | 0.91 | 0.79                               | 0.64   | 0.97 |
| Group 6                         | 0.15                                 | 0.07   | 0.31 | 0.18                               | 0.08   | 0.38 |

CI, confidence interval; HR, hazard ratio; MDA, Mediterranean diet adherence. <sup>a</sup> Adjusted for gender and age; <sup>b</sup> Adjusted for gender, age, smoke, and exercise.
